# Supplementary material
Source: publisher figshare collection journal article supplement (https://acs.figshare.com/ndownloader/files/9814534)
Supplement: Supplementary file 1 [file 9814534]

# Time-Resolved Fluorescence Spectroscopy Reveals Fine Structure and Dynamics of Poly(L-lysine) and Polyethylenimine Based DNA Polyplexes

*Ekaterina S. Lisitsyna<sup>\*,†,‡</sup>, Tiia-Maaria Ketola<sup>‡,⊥</sup>, Emmanuelle Morin-Picardat<sup>†,§,#</sup>, Huamin Liang<sup>‡,°</sup>, Martina Hanzlíková<sup>†</sup>, Arto Urtti<sup>†,§</sup>, Marjo Yliperttula<sup>†,||</sup>, Elina Vuorimaa-Laukkanen<sup>‡</sup>*

<sup>†</sup>Division of Pharmaceutical Biosciences, Centre for Drug Research, Faculty of Pharmacy, University of Helsinki, P. O. Box 56, FI-00014 Helsinki, Finland

<sup>‡</sup>Department of Chemistry and Bioengineering, Tampere University of Technology, P.O. Box 541, FI-33101 Tampere, Finland

<sup>§</sup>School of Pharmacy, Faculty of Health Sciences, University of Eastern Finland, P.O. Box 1627, FI-70211 Kuopio, Finland

<sup>||</sup>Department of Pharmaceutical and Pharmacological Sciences, University of Padova, via F.Marzolo, 5, 35131 Padova, Italy

\*corresponding author: ekalisit@gmail.com, ekaterina.lisitsyna@tut.fi, tel: +358469521118

<sup>⊥</sup>No current affiliation

<sup>#</sup>Present address: National Institute of Agricultural Research (INRA), Rue de la Géraudière BP 71627, 44 316 Nantes Cedex 3, France

<sup>°</sup>Present address: Building 2-413, Hefei Institutes of Physical Science, CAS, Shushanhu Road 350, 230031 Hefei, Anhui, P.R. China

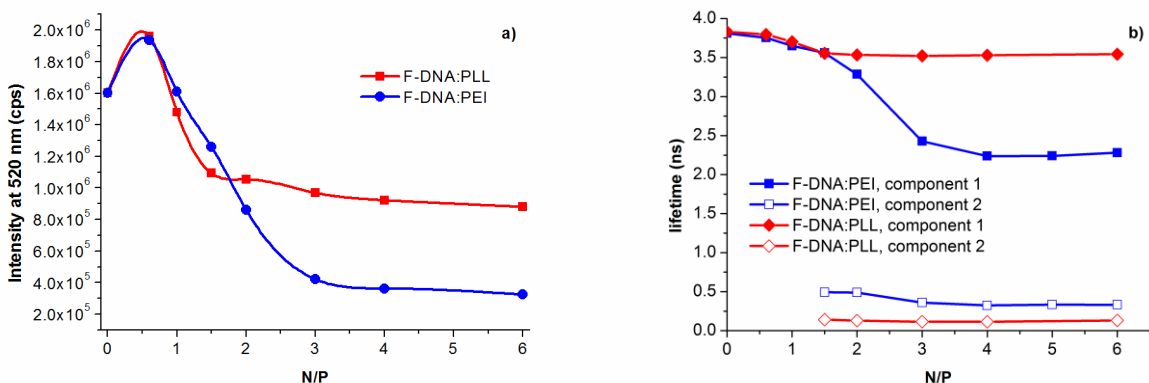

Figure S1. a) Area of the fluorescence spectra for F-DNA:PLL and F-DNA:PEI at different N/P ratios. b) Fluorescence lifetimes for F-DNA, F-DNA:PLL and F-DNA:PEI at different N/P ratios. Excitation wavelength was 483 nm. Lifetimes were calculated using global fitting with equation 1.

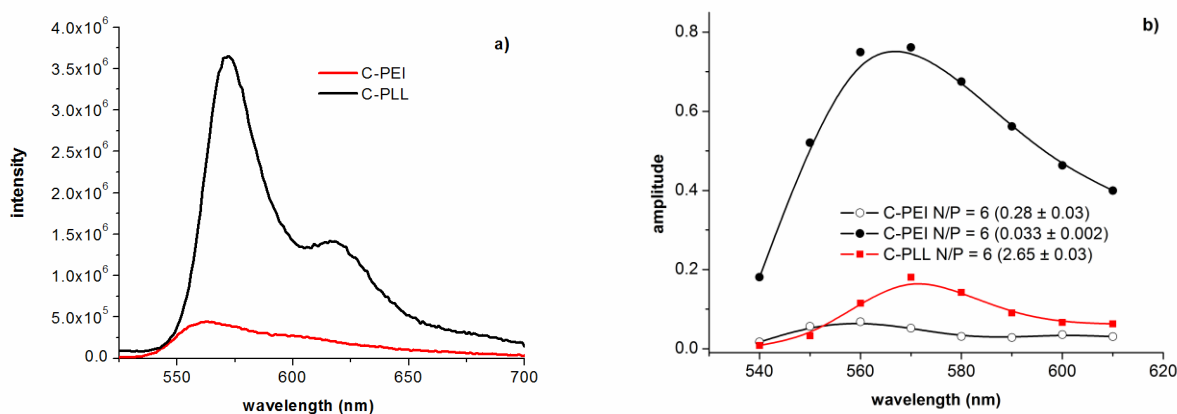

Figure S2. a) Fluorescence spectra and b) DAS of C-PLL and C-PEI at the concentration corresponding to N/P ratio 6. Excitation wavelength was 483 nm. DAS were calculated using global fitting with equation 1 for C-PLL and equation 2 for C-PEI. The lifetimes of each component are denoted in the legend.

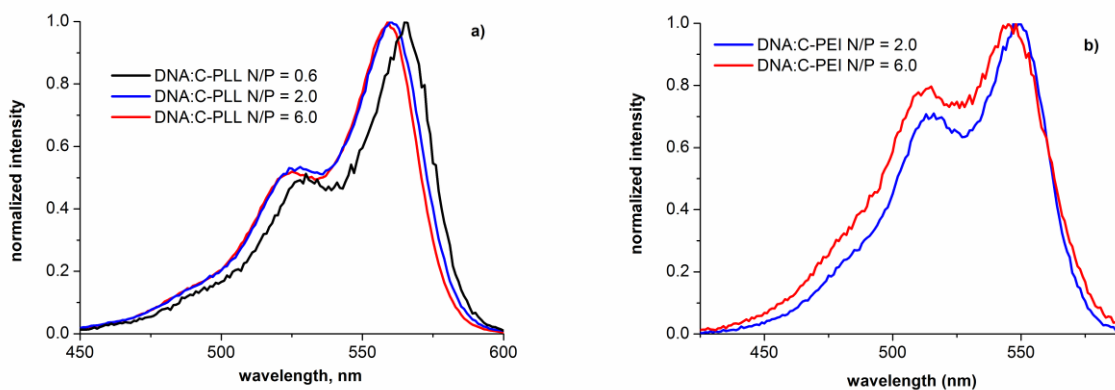

Figure S3. Normalized excitation spectra for a) C-PLL in the presence of unlabeled DNA at N/P = 0.6, 2 and 6 and b) C-PEI in the presence of unlabeled DNA at N/P = 2 and 6. Monitoring wavelength was 610 nm.

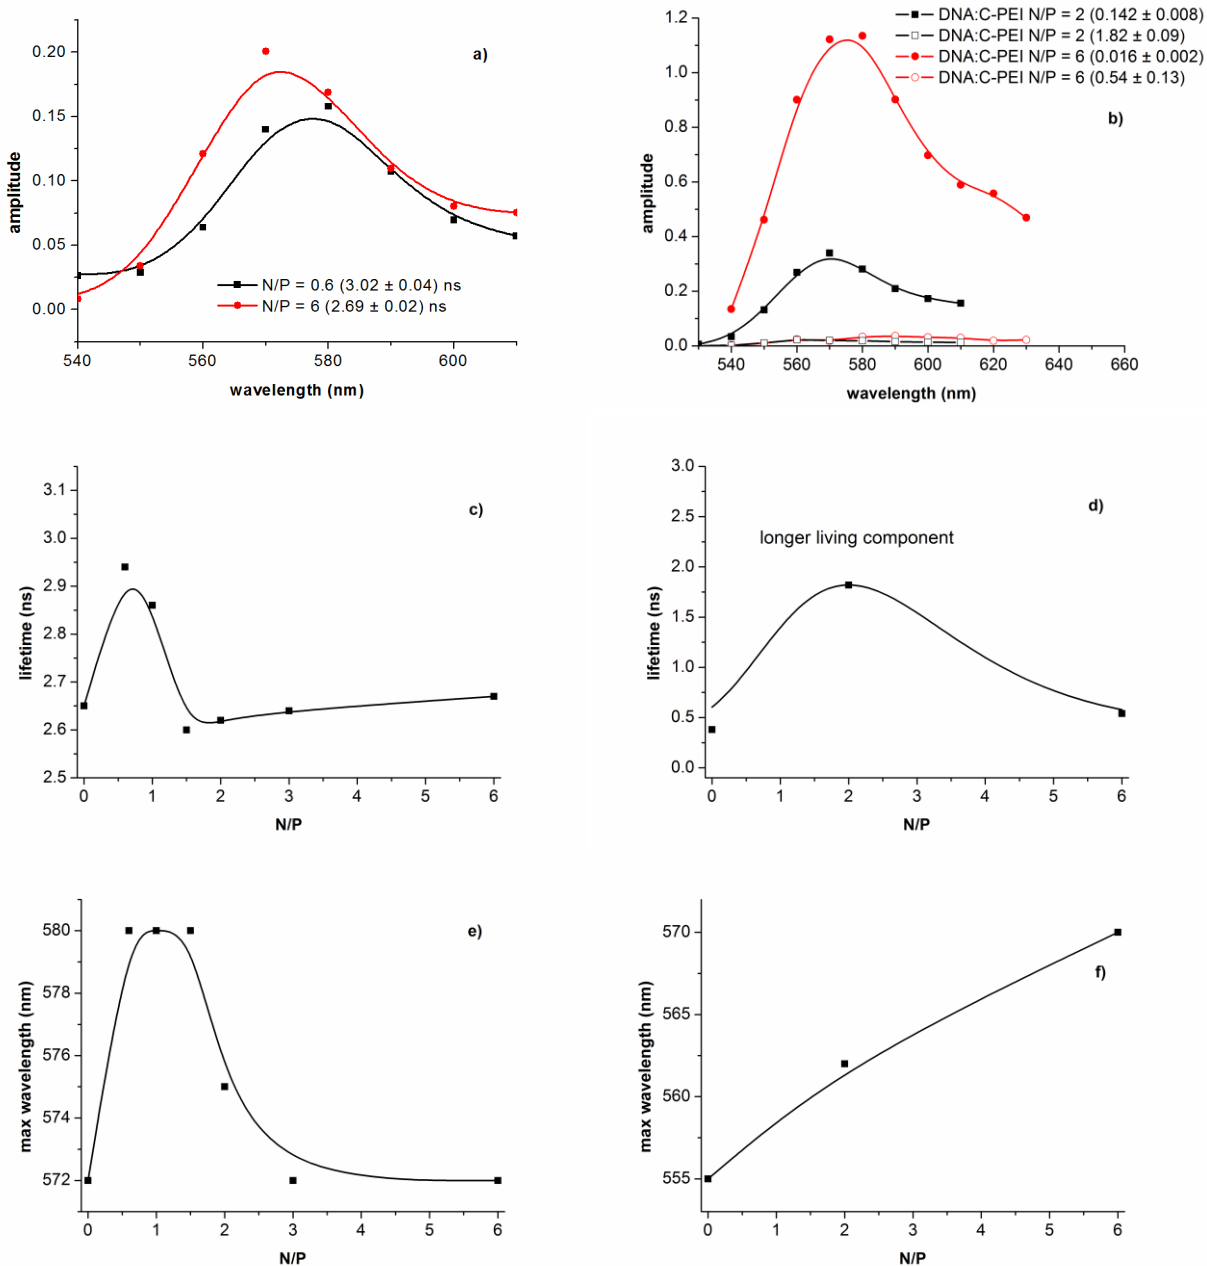

Figure S4. DAS, change in the fluorescence lifetime (0 point corresponds to DNA free system) and the DAS maximum wavelength change for C-PLL (a, c, e) and C-PEI (b, d, f) in the presence of unlabeled DNA. Excitation wavelength was 483 nm. Lifetimes and DAS were calculated using global fitting with equation 1 for C-PLL and equation 2 for C-PEI. The lifetimes of each component in DAS are denoted in the legends.

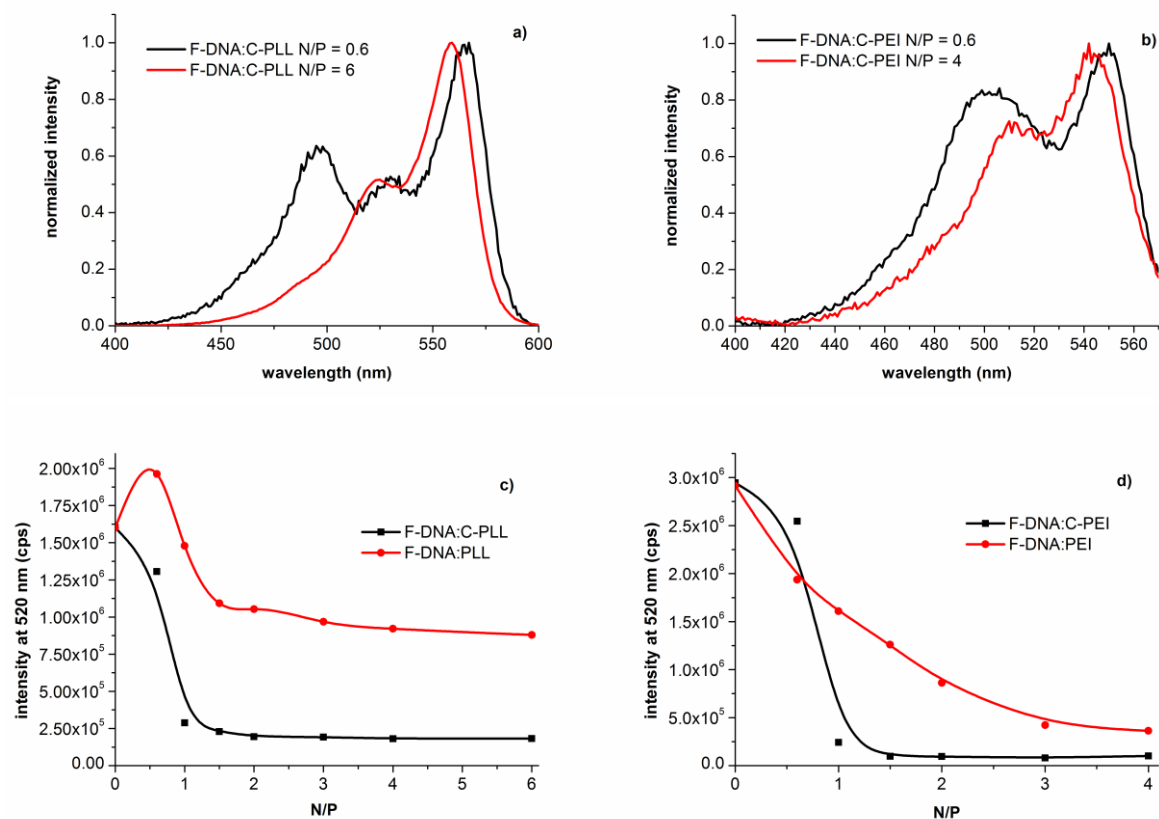

Figure S5. Normalized excitation spectra for a) F-DNA:C-PLL system at N/P 0.6 and 6; b) F-DNA:C-PEI system at N/P 0.6 and 4. Fluorescence intensity as a function of N/P ratio for c) F-DNA:C-PLL and F-DNA:PLL; d) F-DNA:C-PEI and F-DNA:PEI systems at 520 nm, at the maximum wavelength of F-DNA. The excitation spectra were monitored at 610 nm. Excitation wavelength was 483 nm.

Table S1. Lifetimes,  $\beta$  parameters and weighted mean square deviations  $\chi^2$  for F-DNA:C-PLL and F-DNA:PLL:C-PLL, F-DNA:C-PEI and F-DNA:PEI:C-PEI at different N/P ratios.

| Sample <sup>a</sup>                        | Fitting model <sup>c</sup> | $\tau_1$ (exp)         | $\tau_2$ (st exp)          | $\beta$           | $\chi^2$ |
|--------------------------------------------|----------------------------|------------------------|----------------------------|-------------------|----------|
| F-DNA:C-PEI <sub>0.6</sub>                 | exp + st exp               | $3.77 \pm 0.03$ (55%)  | $0.10$ (45%) <sup>d</sup>  | $0.391 \pm 0.029$ | 1.01     |
| F-DNA:C-PEI <sub>1</sub>                   | exp + st exp               | $3.41 \pm 0.19$ (1.5%) | $0.030$ (99%) <sup>d</sup> | $0.401 \pm 0.005$ | 0.89     |
| F-DNA:C-PEI <sub>1.5</sub>                 | exp + st exp               | $3.09 \pm 0.28$ (1%)   | $0.043$ (99%) <sup>d</sup> | $0.426 \pm 0.007$ | 1.02     |
| F-DNA:C-PEI <sub>2</sub>                   | exp + st exp               | $3.13 \pm 0.23$ (1%)   | $0.022$ (99%) <sup>d</sup> | $0.439 \pm 0.009$ | 0.89     |
| F-DNA:C-PEI <sub>3</sub>                   | exp + st exp               | $3.11 \pm 0.22$ (1%)   | $0.028$ (99%) <sup>d</sup> | $0.499 \pm 0.013$ | 0.92     |
| F-DNA:C-PEI <sub>4</sub>                   | exp + st exp               | $3.13 \pm 0.04$ (1%)   | $0.035$ (99%) <sup>d</sup> | $0.544 \pm 0.015$ | 0.92     |
| F-DNA:PEI <sub>2</sub>                     | exp                        | $3.27 \pm 0.05$ (100%) | -                          | -                 | 0.97     |
| F-DNA:PEI <sub>2</sub> :C-PEI <sub>3</sub> | exp + st exp               | $2.88 \pm 0.11$ (8%)   | $0.103$ (92%) <sup>d</sup> | $0.483 \pm 0.016$ | 0.82     |
| F-DNA:PEI <sub>2</sub> :C-PEI <sub>4</sub> | exp + st exp               | $3.04 \pm 0.14$ (3%)   | $0.055$ (97%) <sup>d</sup> | $0.505 \pm 0.008$ | 0.81     |
| F-DNA:PEI <sub>2</sub> :C-PEI <sub>5</sub> | exp + st exp               | $3.00 \pm 0.13$ (3%)   | $0.053$ (97%) <sup>d</sup> | $0.560 \pm 0.017$ | 0.79     |
| F-DNA:PEI <sub>2</sub> :C-PEI <sub>6</sub> | exp + st exp               | $3.00 \pm 0.12$ (3%)   | $0.079$ (97%) <sup>d</sup> | $0.798 \pm 0.031$ | 0.81     |
| Sample <sup>b</sup>                        | Fitting model <sup>c</sup> | $\tau_1$ (exp)         | $\tau_2$ (exp)             |                   | $\chi^2$ |

|                                            |     |                   |                        |   |      |
|--------------------------------------------|-----|-------------------|------------------------|---|------|
| F-DNA:C-PLL <sub>0.6</sub>                 | exp | 3.69 ± 0.05 (89%) | 1.60 ± 0.33 (11%)      | - | 1.11 |
| F-DNA:C-PLL <sub>1</sub>                   | exp | 2.58 ± 0.06 (47%) | 0.46 ± 0.06 (53%)      | - | 1,39 |
| F-DNA:C-PLL <sub>1.5</sub>                 | exp | 2.60 ± 0.07 (39%) | 0.40 ± 0.05 (61%)      | - | 1,39 |
| F-DNA:C-PLL <sub>2</sub>                   | exp | 2.68 ± 0.07 (40%) | 0.41 ± 0.06 (60%)      | - | 1,27 |
| F-DNA:C-PLL <sub>3</sub>                   | exp | 2.72 ± 0.08 (44%) | 0.44 ± 0.07 (56%)      | - | 1,17 |
| F-DNA:C-PLL <sub>4</sub>                   | exp | 2.71 ± 0.09 (46%) | 0.37 ± 0.08 (54%)      | - | 1,01 |
| F-DNA:C-PLL <sub>6</sub>                   | exp | 2.76 ± 0.11 (53%) | 0.33 ± 0.12 (47%)      | - | 0,95 |
| F-DNA:PLL <sub>2</sub>                     | exp | 3.49 ± 0.03 (91%) | 0.11 (9%) <sup>d</sup> | - | 1.15 |
| F-DNA:PLL <sub>2</sub> :C-PLL <sub>3</sub> | exp | 2.92 ± 0.04 (68%) | 0.46 ± 0.11 (32%)      | - | 1.45 |
| F-DNA:PLL <sub>2</sub> :C-PLL <sub>4</sub> | exp | 2.84 ± 0.06 (63%) | 0.50 ± 0.12 (37%)      | - | 1.24 |
| F-DNA:PLL <sub>2</sub> :C-PLL <sub>6</sub> | exp | 2.73 ± 0.07 (61%) | 0.39 ± 0.12 (39%)      | - | 1.10 |

<sup>a</sup> for C-PEI containing polyplexes the global fitting of the decay curves at all wavelengths was performed.

<sup>b</sup> for C-PLL containing polyplexes the decay curves monitored at 520 nm were taken for the fitting.

<sup>c</sup> exp: sum of exponents model (eq 1); exp + st exp: mixed model containing exponential and stretched exponential parts (eq 2).

<sup>d</sup> it is not possible to determine the accuracy for the lifetimes  $\leq 0.1$  ns due to the time resolution of the system.

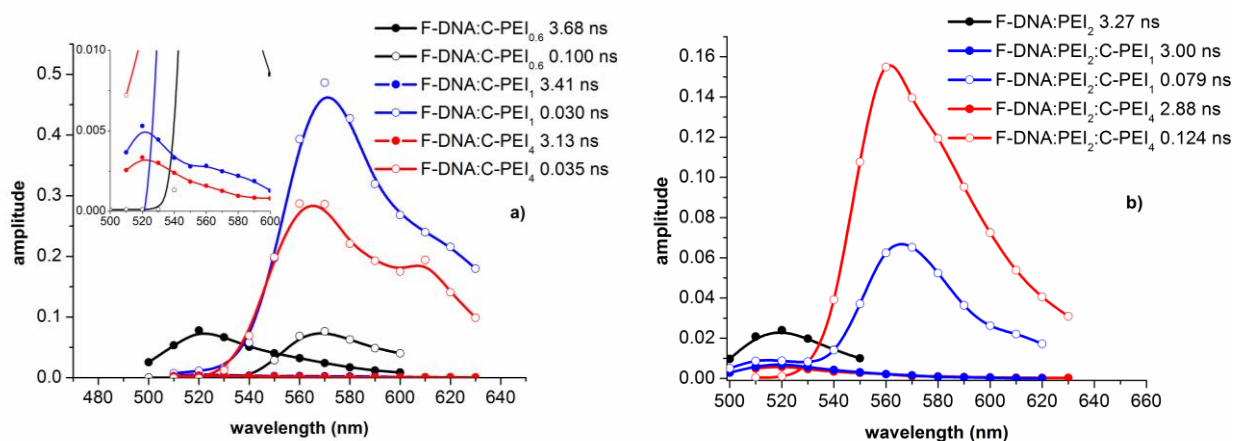

Figure S6. DAS spectra for a) F-DNA:C-PEI and b) F-DNA:PEI<sub>2</sub>:C-PEI<sub>1-4</sub> systems at different N/P ratios, calculated using global fitting with equation 2. Excitation wavelength was 483 nm.
